# Supplementary material for: 2-Ferrocenyl-2-thiazoline as a building block of novel phosphine-free ligands
Source: Royal Society of Chemistry journal article supplement (doi:10.1039/c3dt50451d), 2013-01-01

## Supporting Information

# 2-Ferrocenyl-2-thiazoline as building block of novel phosphine-free ligands.

Ricardo Corona-Sánchez<sup>a</sup>, Rubén A. Toscano<sup>a</sup>, M. Carmen Ortega-Alfaro<sup>b</sup>, Cesar Sandoval-Chávez<sup>a</sup>, José G. López-Cortés<sup>a\*</sup>

<sup>a</sup> Instituto de Química and <sup>b</sup> Instituto de Ciencias Nucleares, Universidad Nacional Autónoma de México, Circuito Exterior, Ciudad Universitaria, México D.F. 04510, México.

### Table of Contents

|                                                       |     |
|-------------------------------------------------------|-----|
| <sup>1</sup> H/ <sup>13</sup> C NMR Spectra Data..... | S2  |
| Compound <b>4</b> .....                               | S2  |
| Compound <b>5b</b> .....                              | S3  |
| Compound <b>5c</b> .....                              | S4  |
| Compound <b>5d</b> .....                              | S5  |
| Compound <b>5e</b> .....                              | S6  |
| Compound <b>5f</b> .....                              | S7  |
| Compound <b>5g</b> .....                              | S8  |
| Compound <b>5h</b> .....                              | S9  |
| Compound <b>5i</b> .....                              | S10 |
| Compound <b>5j</b> .....                              | S11 |
| Compound <b>9</b> .....                               | S12 |

### 1. Experimental Details

NMR spectra were recorded at room temperature on a Bruker Avance 300 spectrometer operating at 300 MHz (<sup>1</sup>H) and 75 MHz (<sup>13</sup>C) respectively, using CDCl<sub>3</sub> as solvent. Chemical shifts were reported using TMS as internal reference.

## 2. $^1\text{H}/^{13}\text{C}$ NMR Spectra Data

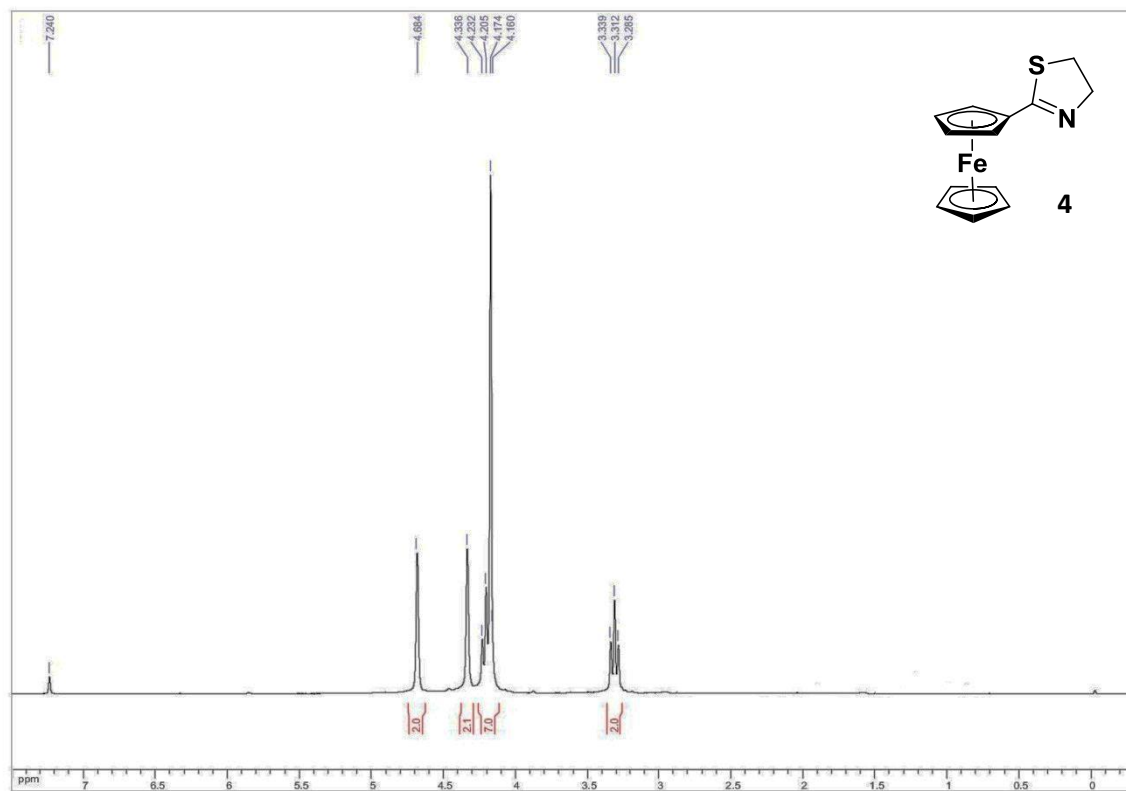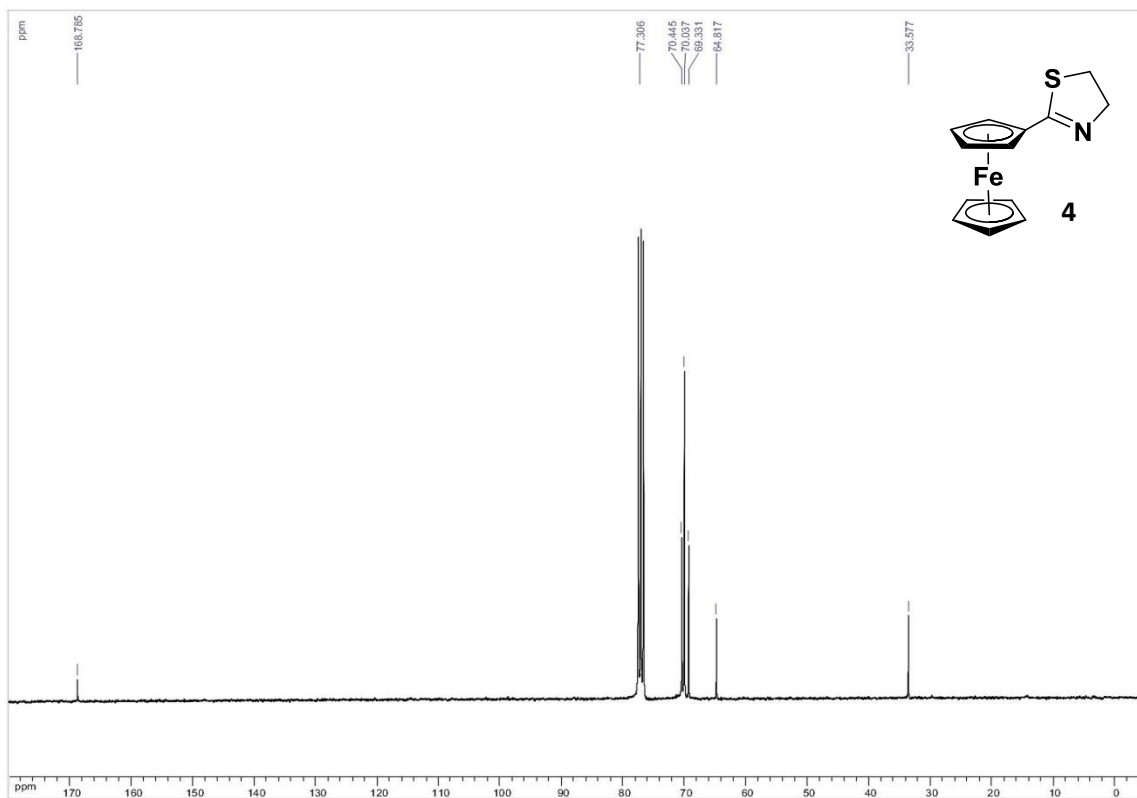

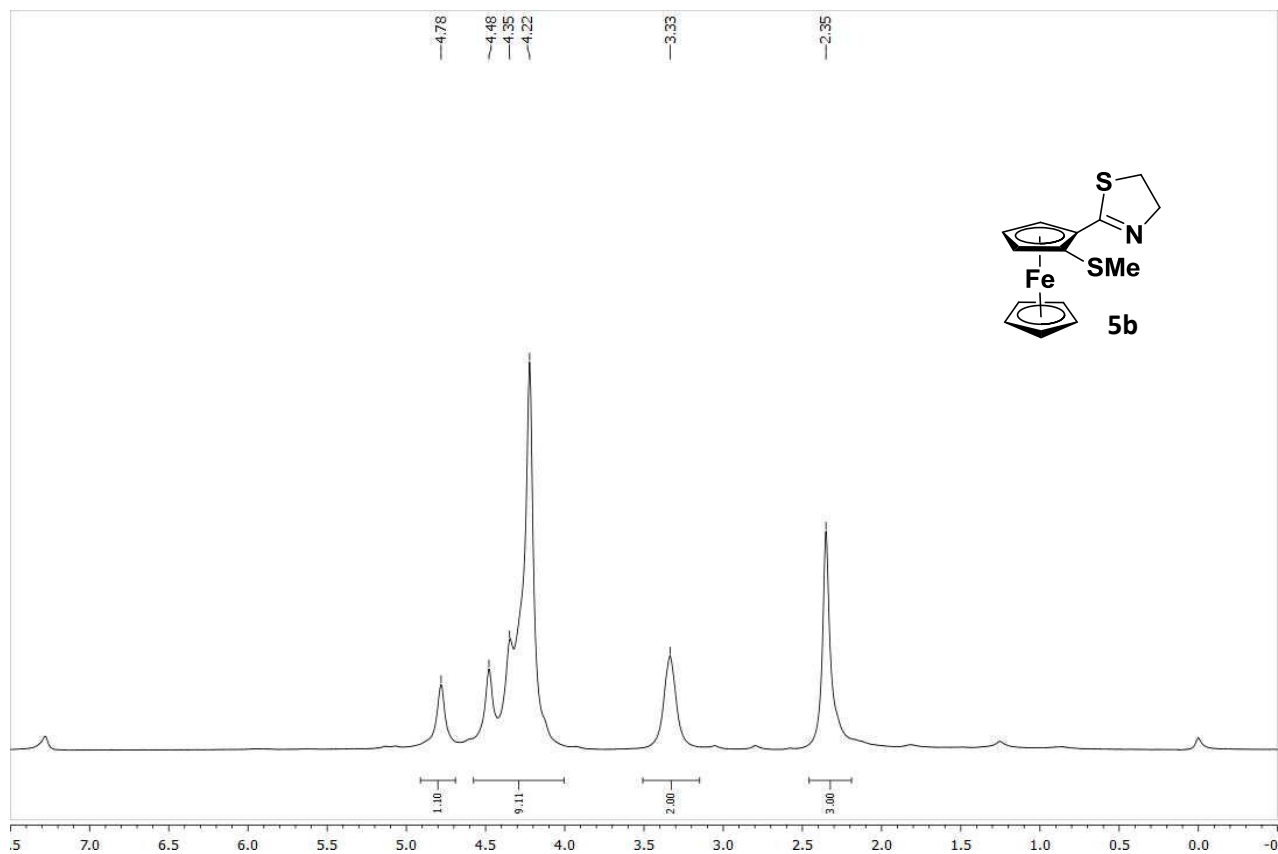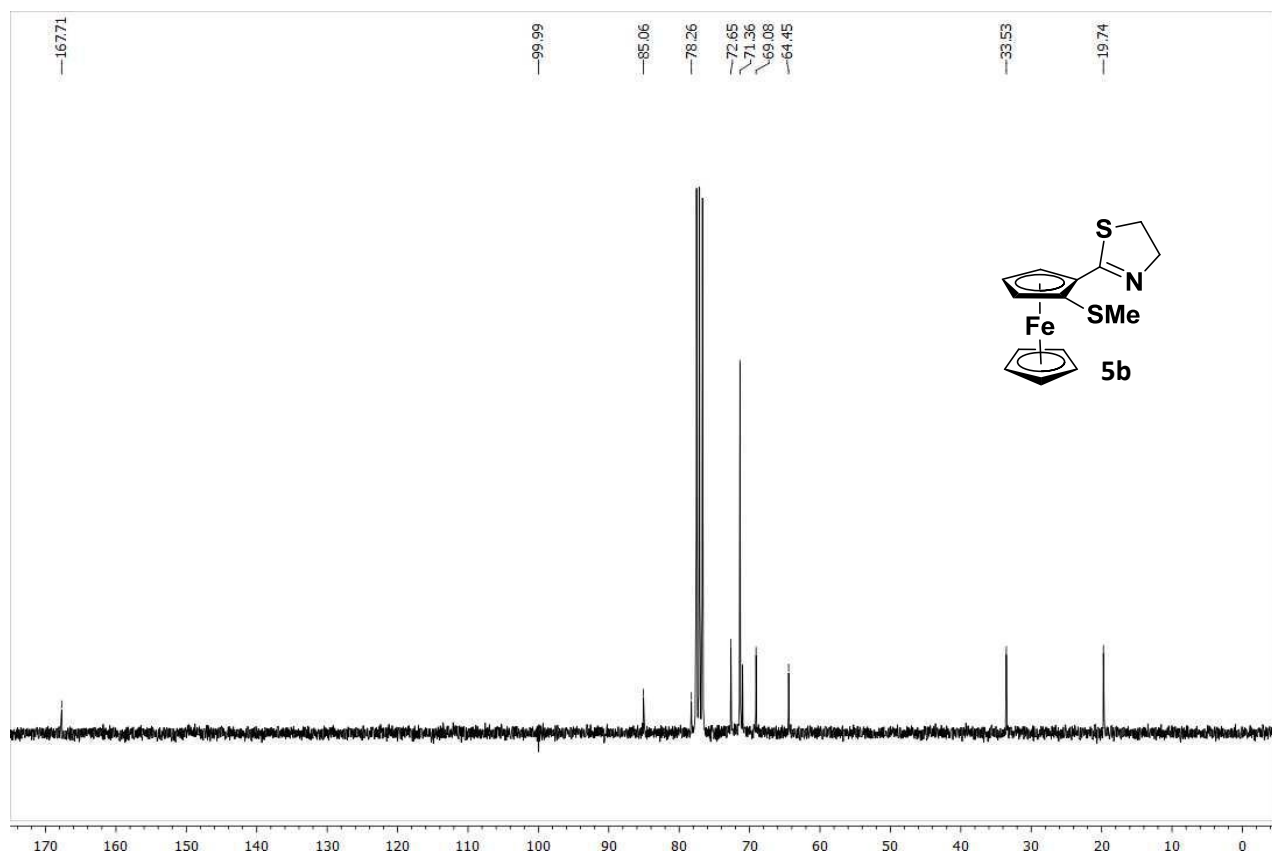

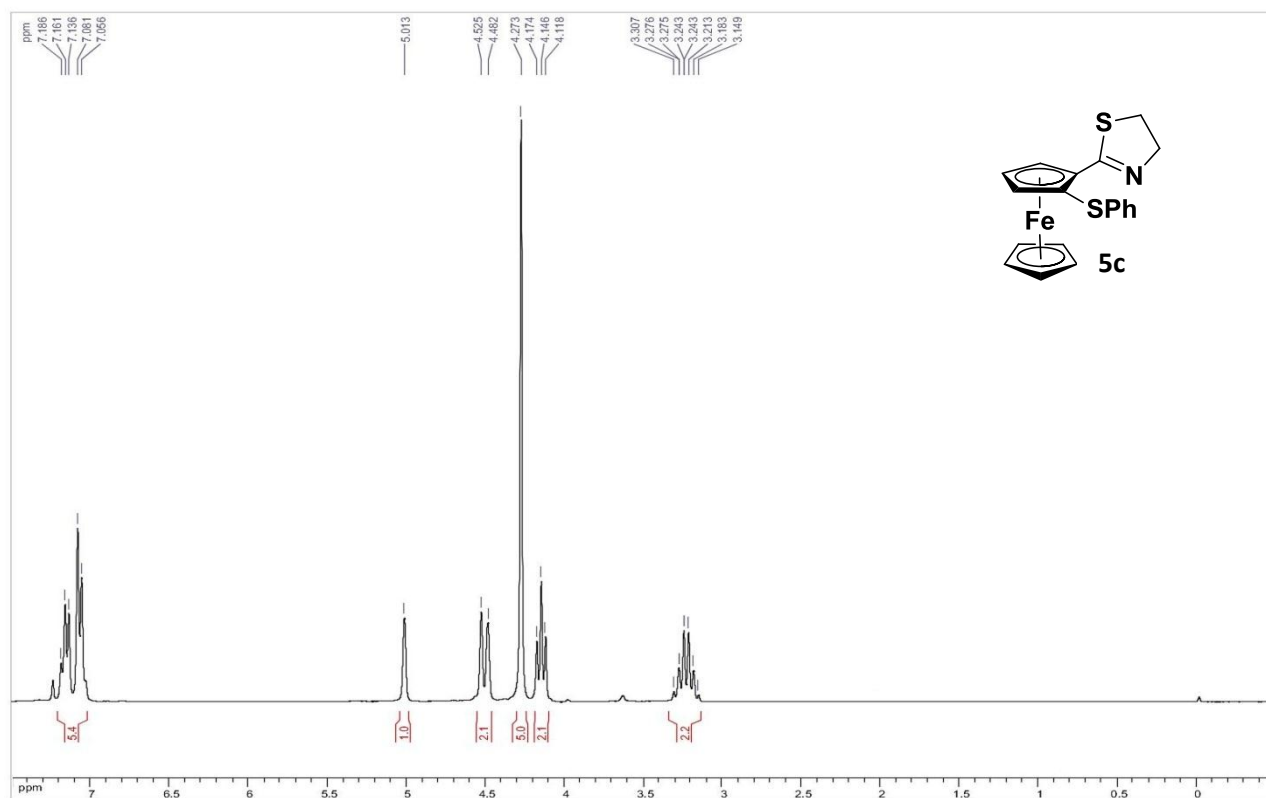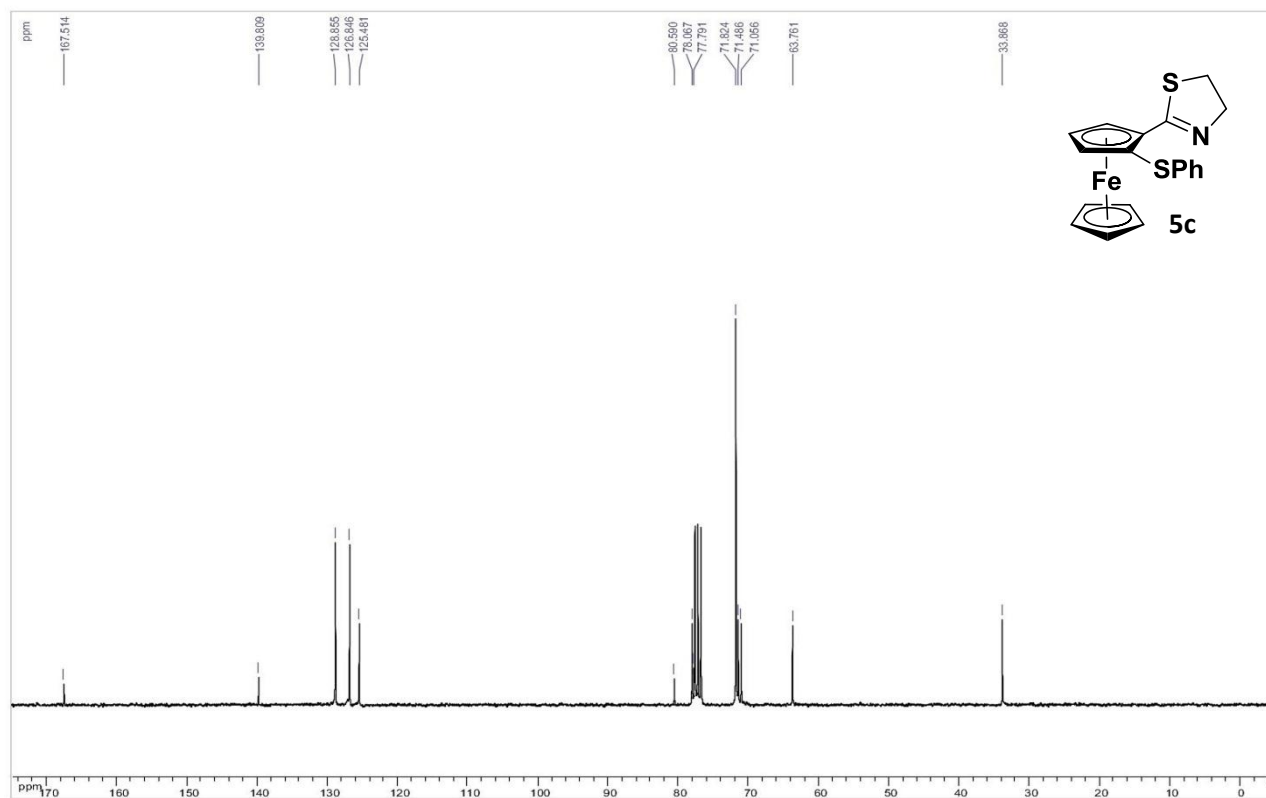

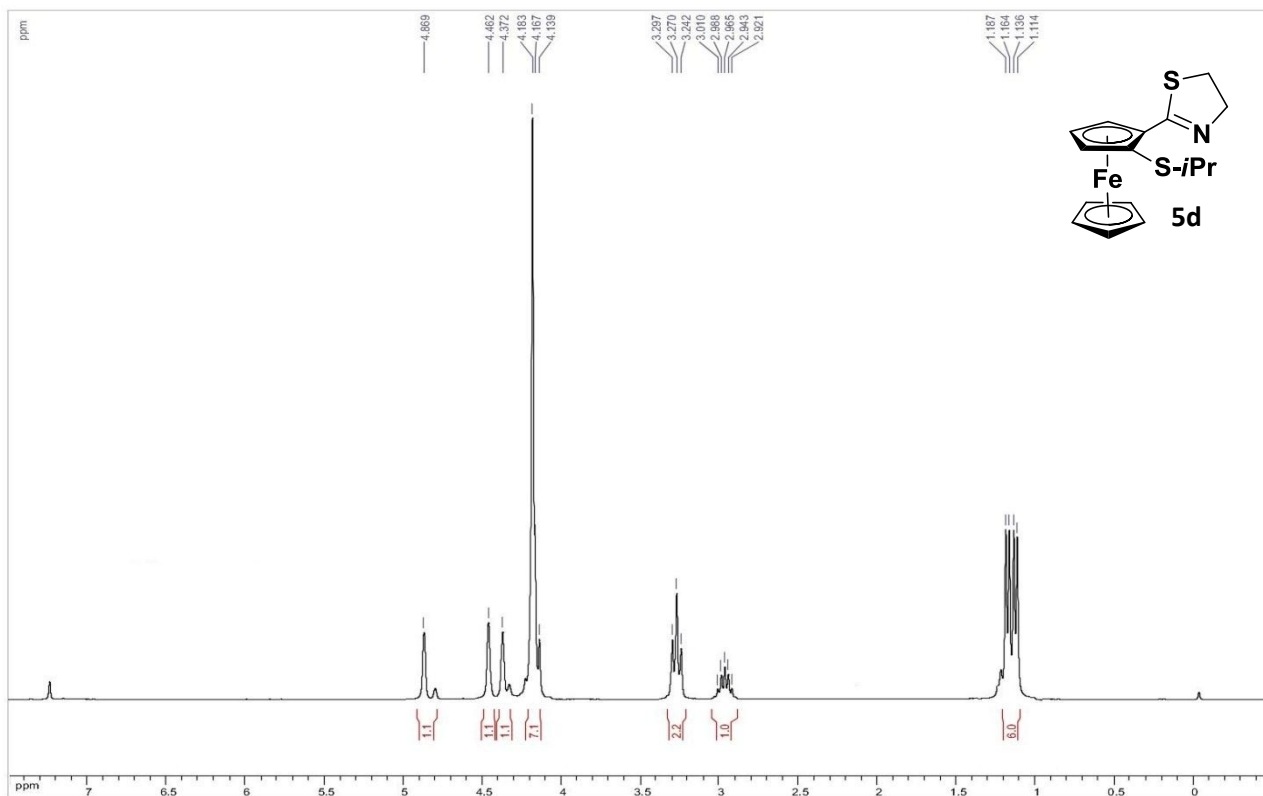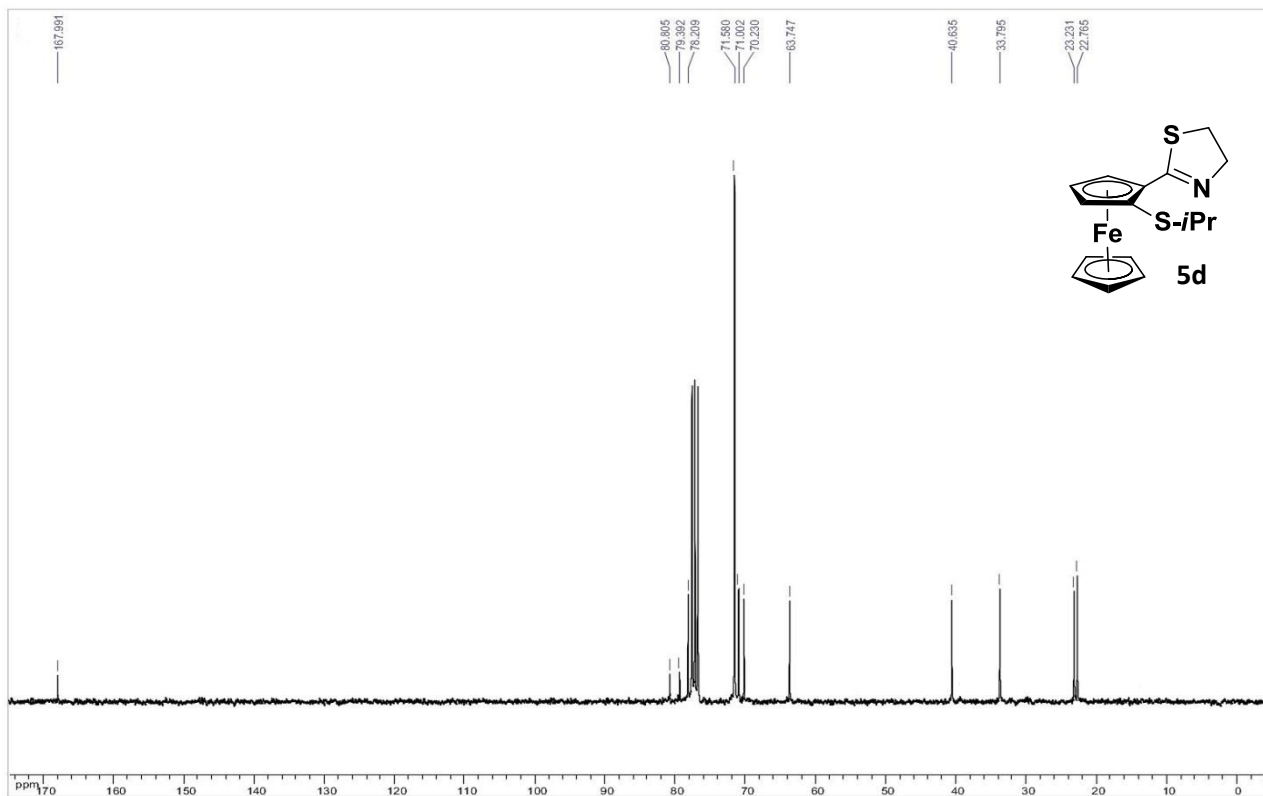

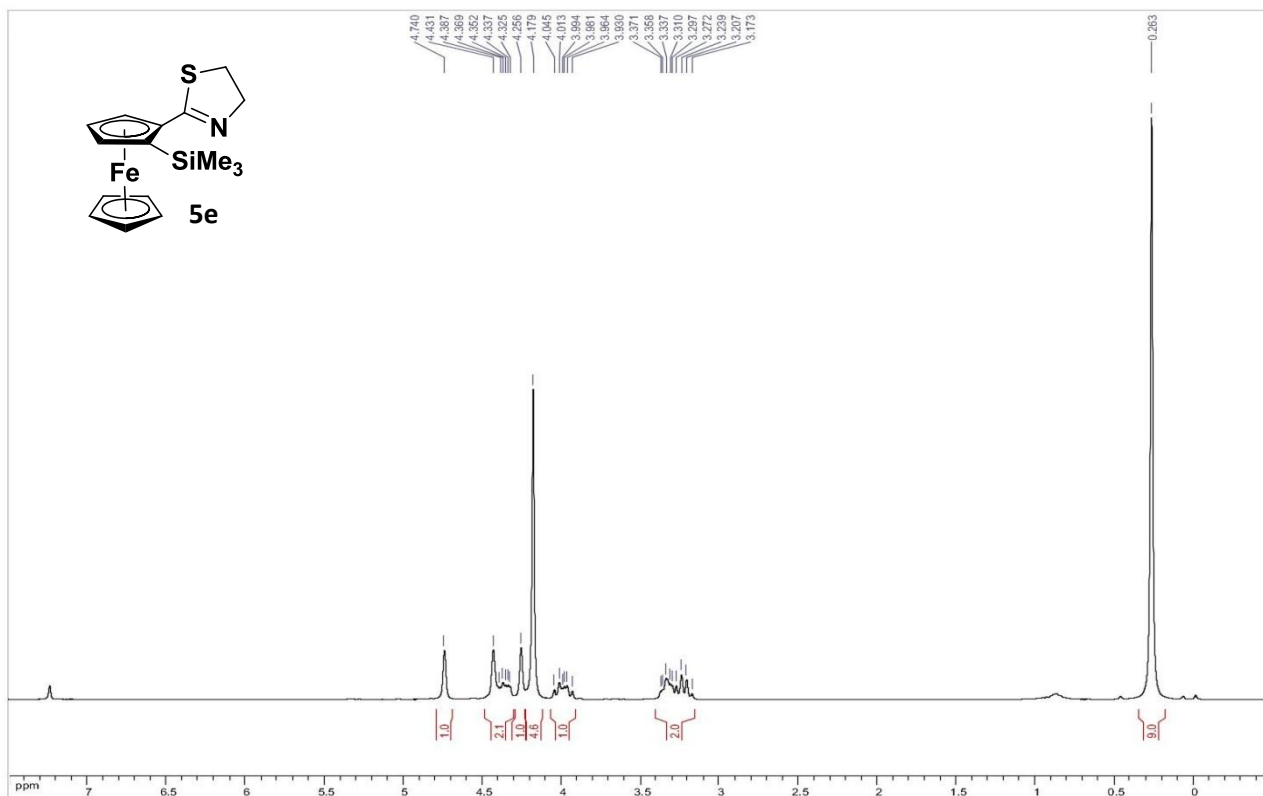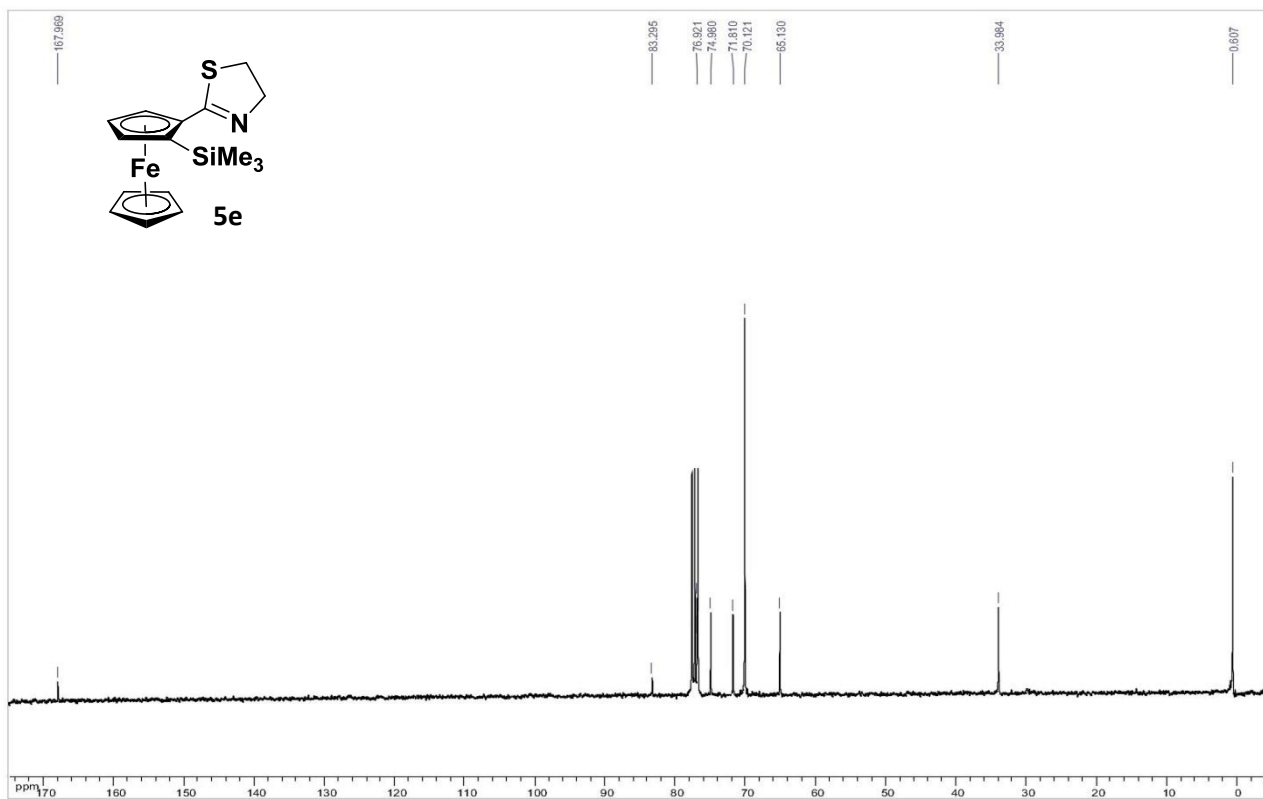

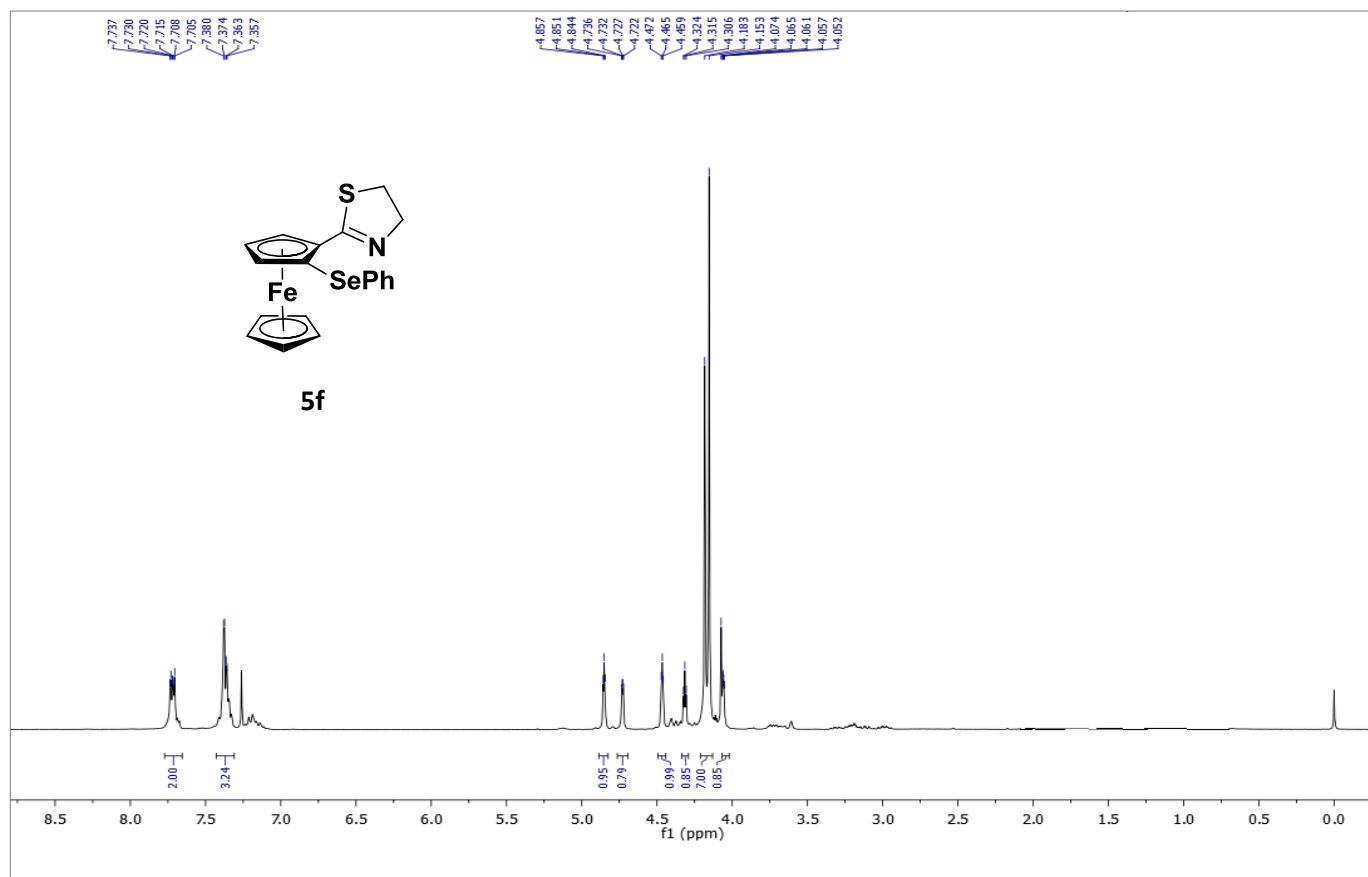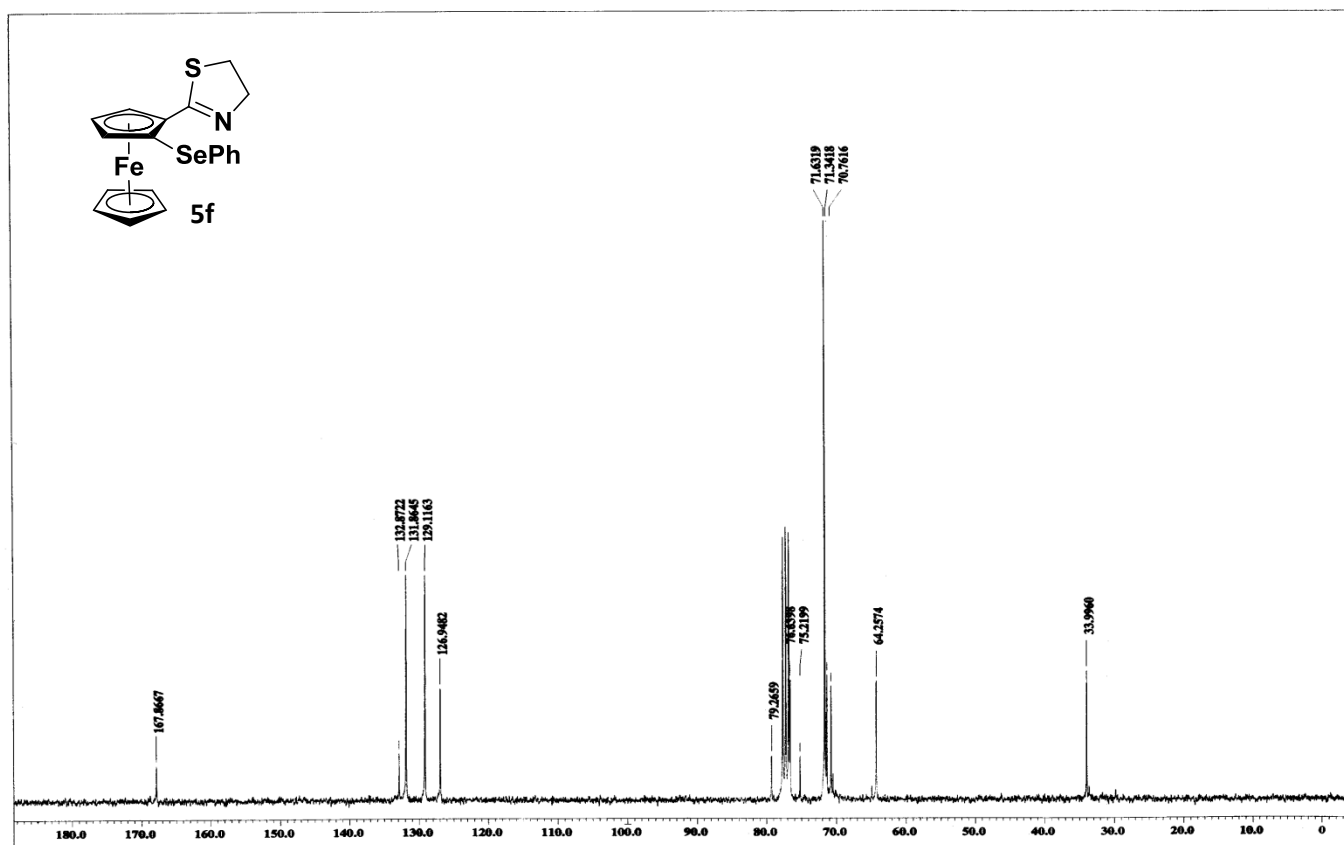

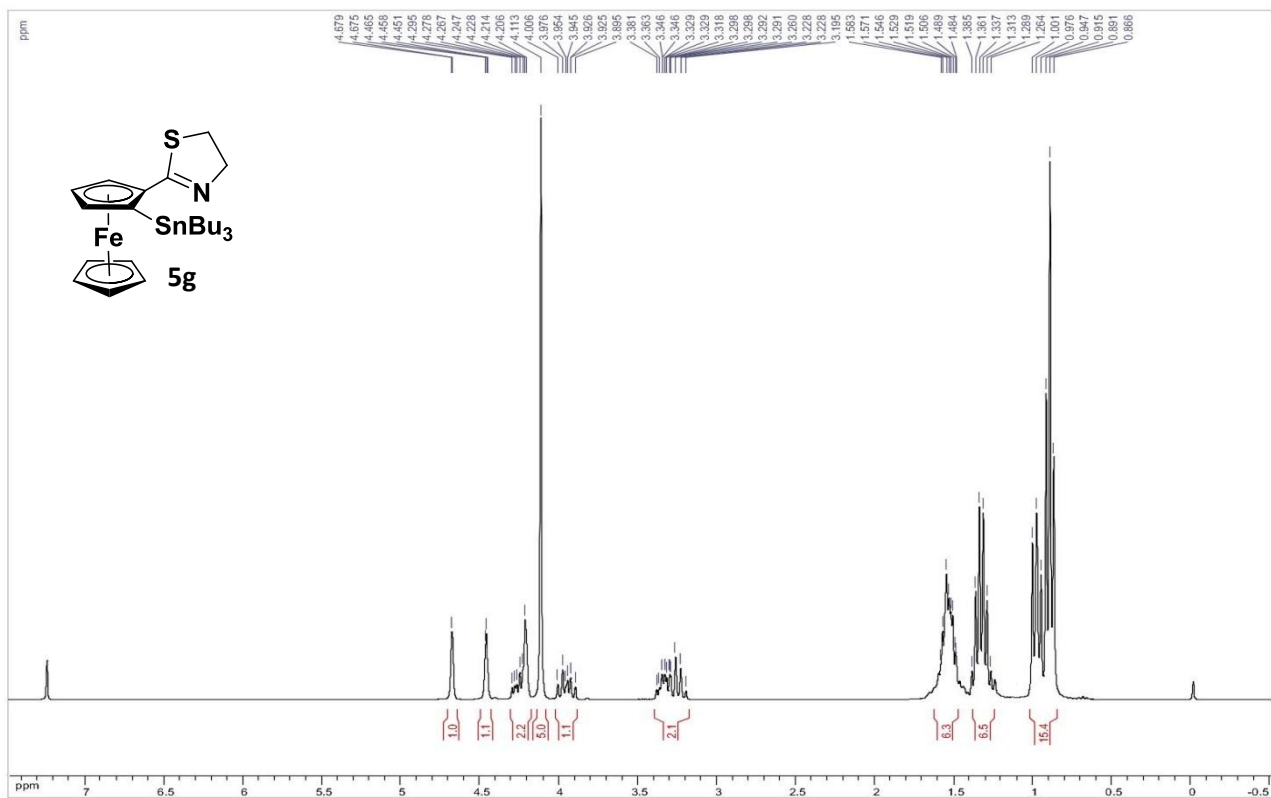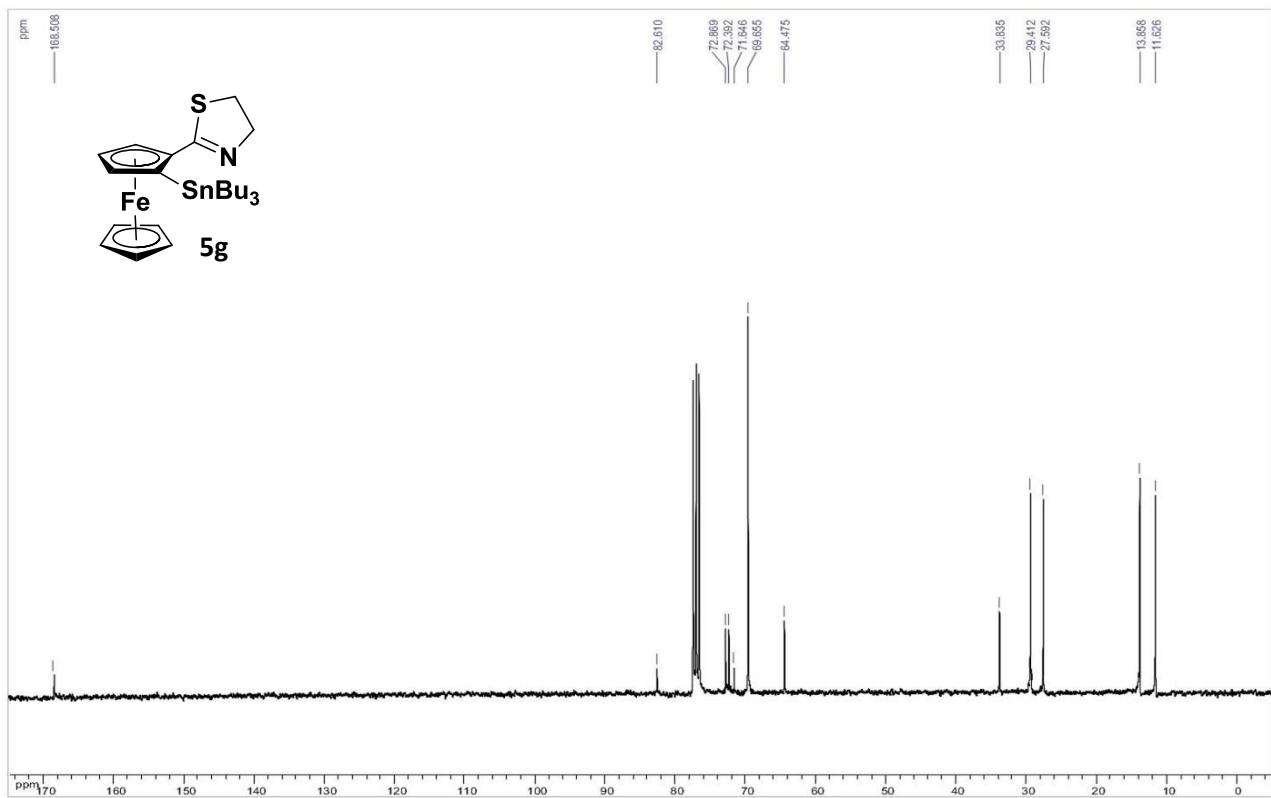



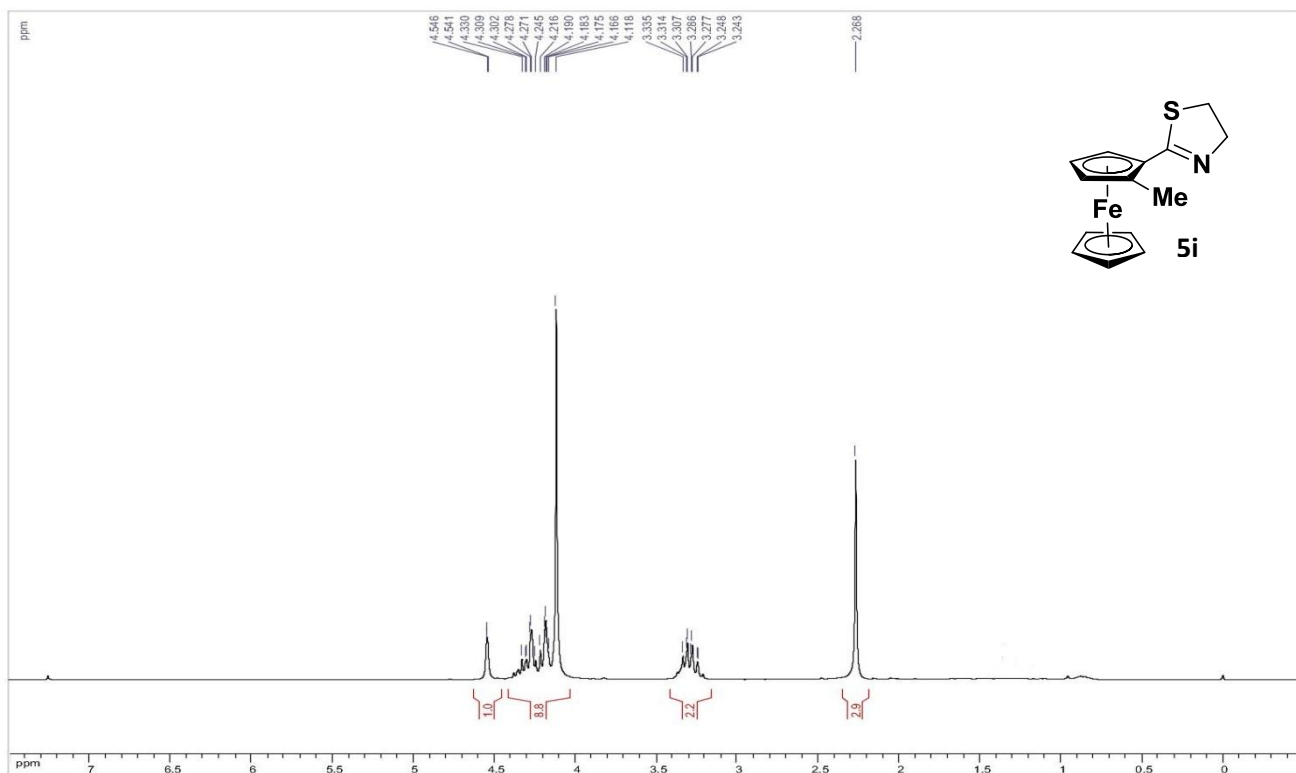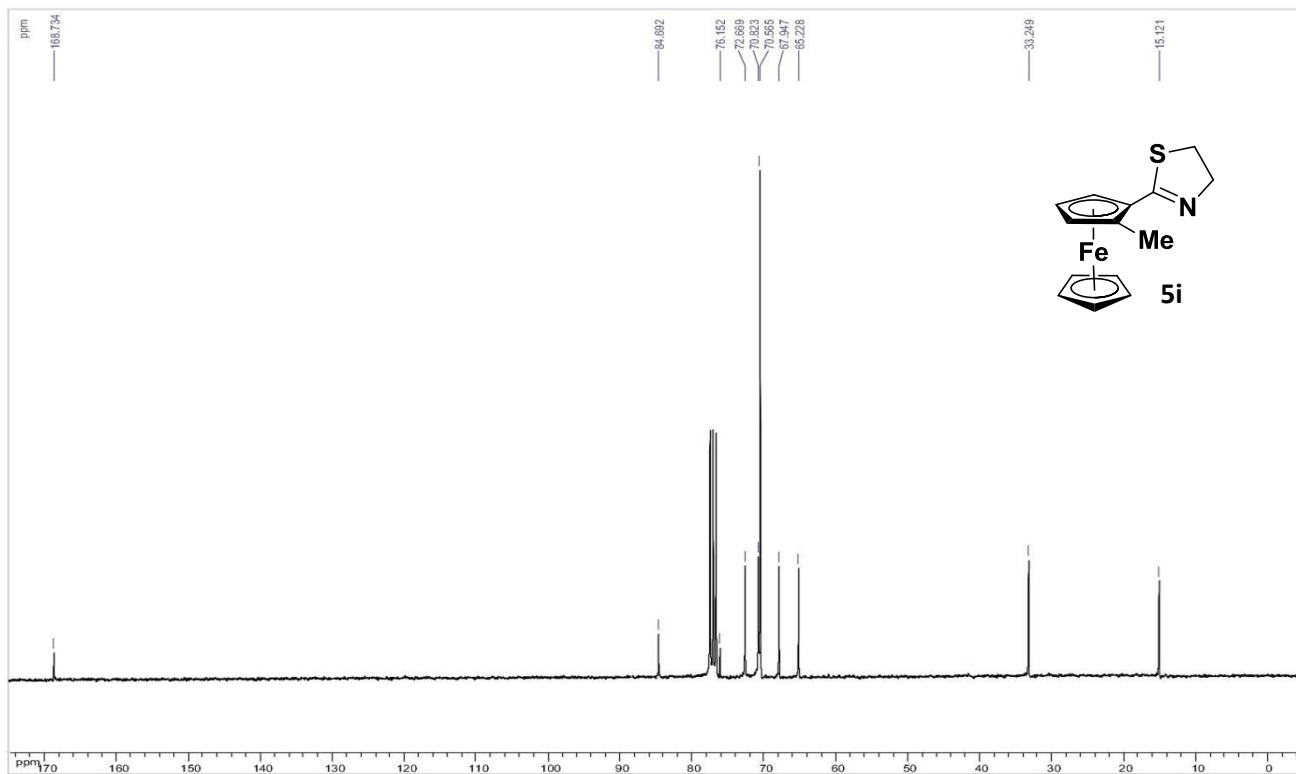

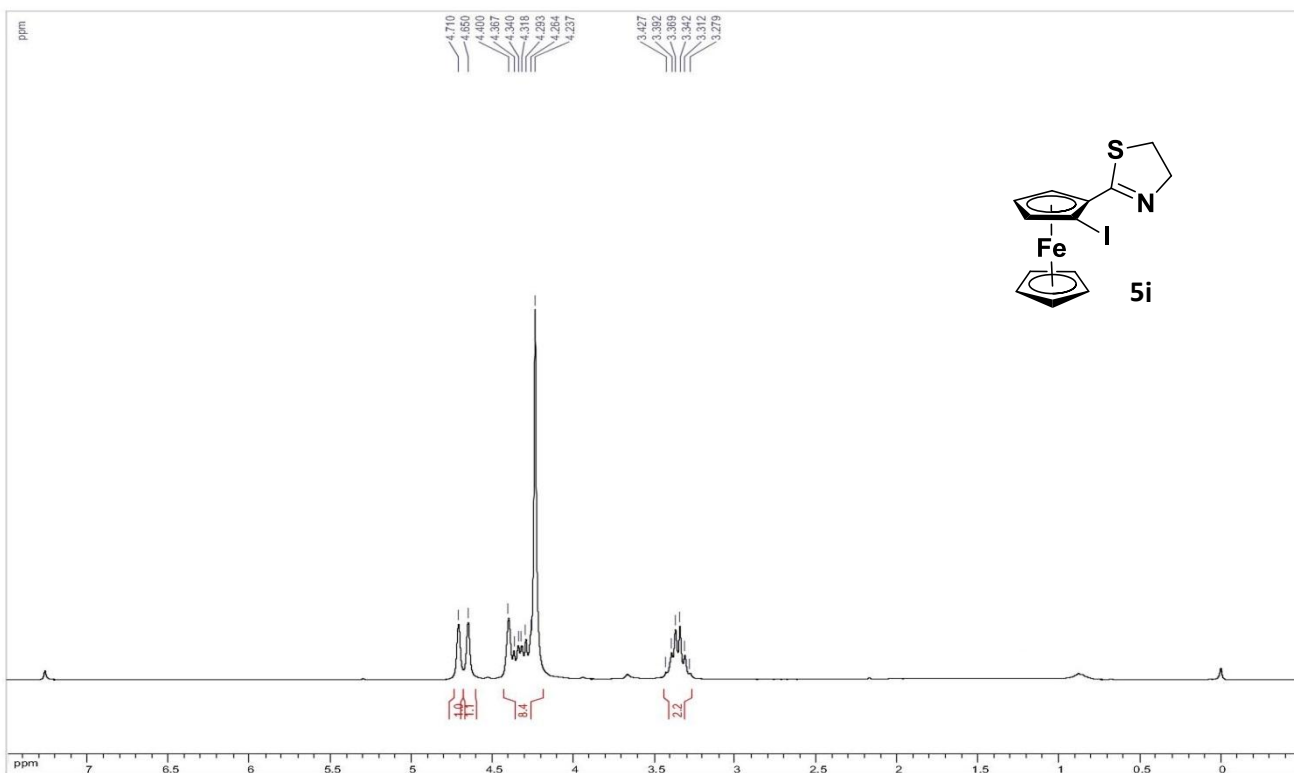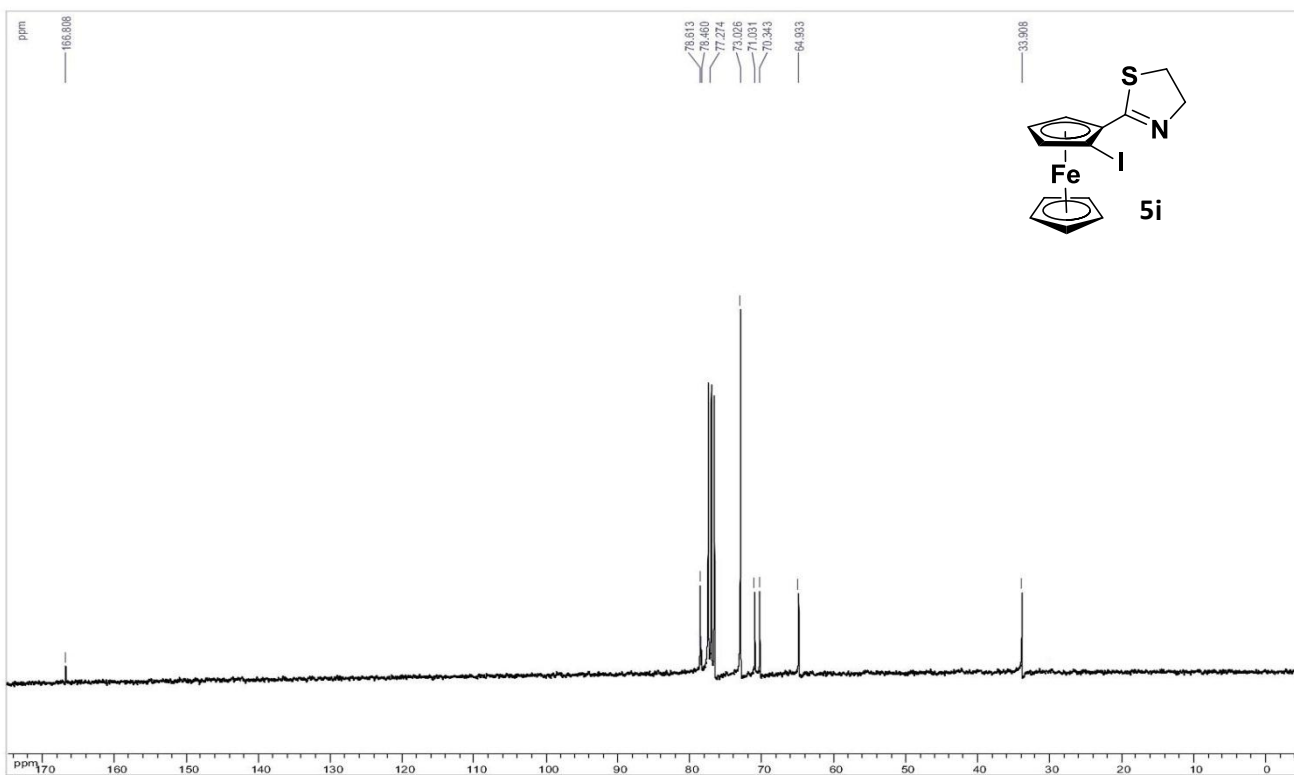

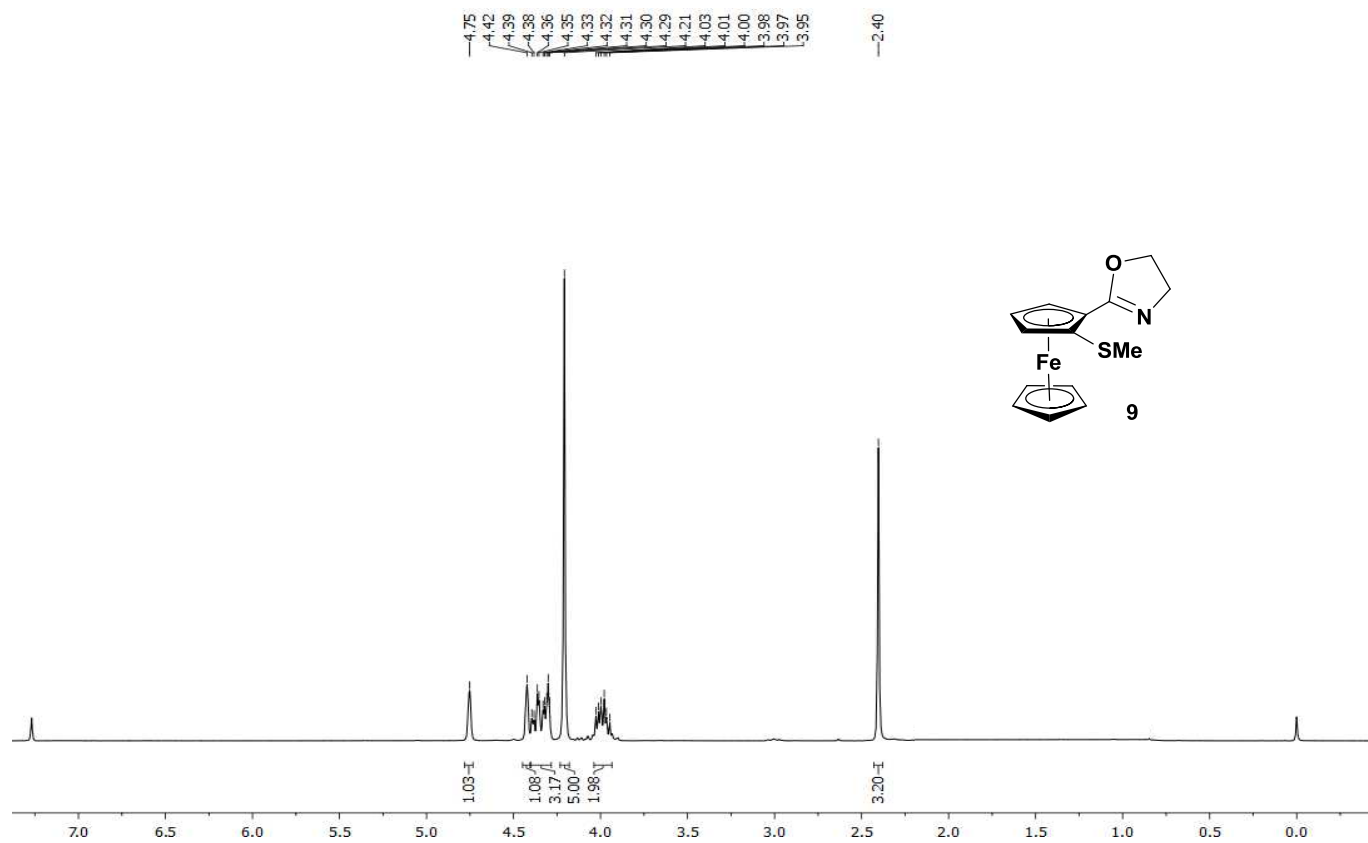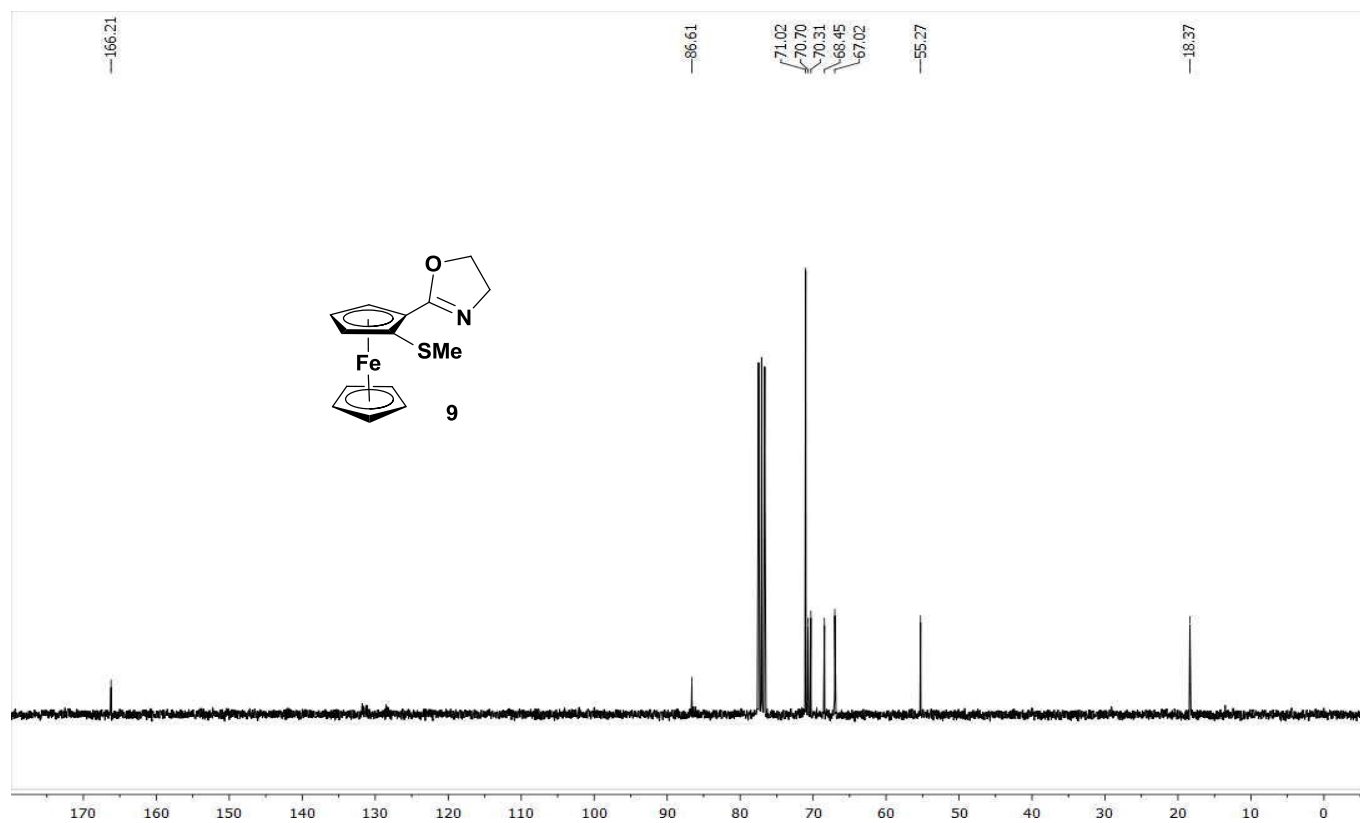

Supplement: c3dt50451d.pdf [file c3dt50451d.pdf]
